# Supplementary figures and images for: Bistable magnetic valves for selective sweat sampling in wearable microfluidics
Source: Royal Society of Chemistry journal article supplement (doi:10.1039/d5lc00576k), 2025-01-01

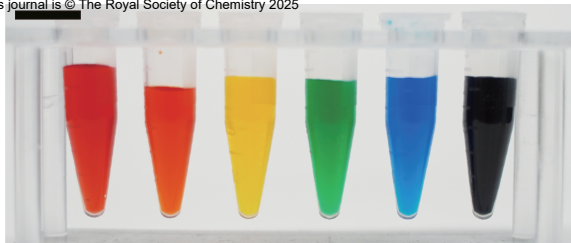

injected liquid

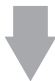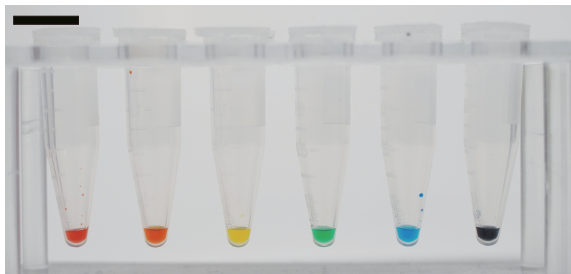

collected liquid

Supplement: d5lc00576k1.pdf [file d5lc00576k1.pdf]
